# Supplementary material for: Unhappy While Depressed: Examining the Dimensionality, Reliability and Validity of the Subjective Happiness Scale in a Spanish Sample of Patients with Depressive Disorders
Source: MDPI journal article supplement (doi:10.3390/ijerph182010964), 2021-10-19
Supplement: s1 [file s1]

**Table S1.** Socio-demographic and clinical characteristics of participants (*n* = 174).

|                                                   |               |
|---------------------------------------------------|---------------|
| Gender                                            |               |
| Male                                              | 34.68%        |
| Female                                            | 65.32%        |
| Age                                               | 50.31 (14.88) |
| Educational level                                 |               |
| No formal education                               | 3.01%         |
| Primary studies                                   | 19.28%        |
| Secondary studies                                 | 32.53%        |
| University studies                                | 45.18%        |
| Marital status                                    |               |
| Married or with a stable partner                  | 50.89%        |
| Single                                            | 30.18%        |
| Separated or divorced                             | 13.61%        |
| Widowed                                           | 5.33%         |
| Occupational status                               |               |
| Market work and/or housework                      | 49.40%        |
| Student                                           | 4.16%         |
| Unemployed                                        | 7.14%         |
| On sick leave                                     | 20.83%        |
| Retired                                           | 18.45%        |
| Main diagnosis                                    |               |
| Major depressive disorder                         | 70.07%        |
| Bipolar I disorder, most recent episode depressed | 11.98%        |
| Dysthymic disorder                                | 7.19%%        |
| Adjustment disorder with depressed mood           | 10.78%        |
| Treatment facility                                |               |
| Outpatient                                        | 84.12%        |
| Inpatient                                         | 15.88%        |
| HDRS <sub>17</sub>                                | 12.68 (8.76)  |
| CGI-S                                             | 3.19 (1.67)   |
| QIDS-SR <sub>16</sub>                             | 11.67 (6.73)  |
| EQ-5D VAS                                         | 52.56 (26.07) |
| MSPSS                                             | 63.39 (17.13) |
| SHS                                               | 3.66 (1.44)   |

Values are given as mean (SD) unless otherwise indicated. CGI-S: Clinical Global Impression-Severity; EQ-5D VAS: EQ-5D Visual Analogue Scale; HDRS<sub>17</sub>: 17-item Hamilton Depression Rating Scale; MSPSS: Multidimensional Scale of Perceived Social Support; QIDS-SR<sub>16</sub>: Quick Inventory of Depressive Symptomatology–Self-report; SHS: Subjective Happiness Scale.
